1 **Title:** Taste Receptor Cells in Mice Express Receptors for the Hormone Adiponectin

2 **Authors:** Sean M. Crosson<sup>1,2,3</sup>, Andrew Marques<sup>1</sup>, Peter Dib<sup>3,4</sup>, Cedrick D. Dotson<sup>2,5</sup>, Steven D.

3 Munger<sup>2,6,7</sup>, Sergei Zolotukhin<sup>1,2</sup>

4 **University Affiliations:** <sup>1</sup>Department of Pediatrics, Division of Cellular and Molecular Therapy;

5 <sup>2</sup>Center for Smell and Taste; <sup>3</sup>Graduate Program in Biomedical Sciences; <sup>4</sup>Department of

6 Anatomy and Cell Biology; <sup>5</sup>Department of Neuroscience; <sup>6</sup>Department of Pharmacology and

7 Therapeutics; <sup>7</sup>Department of Medicine, Division of Endocrinology, Diabetes, and Metabolism;

8 University of Florida, Gainesville, FL, 32610

9 **Abstract**

10 The metabolic hormone adiponectin is secreted into the circulation by adipocytes, and  
11 mediates key biological functions including insulin sensitivity, adipocyte development, and fatty  
12 acid oxidation. Adiponectin is also abundant in saliva, where its functions are poorly understood.  
13 Here we report that murine taste receptor cells express adiponectin receptors, and may be a target  
14 for salivary adiponectin. Analysis of a transcriptome dataset obtained by RNA-seq analysis of  
15 purified circumvallate taste buds, revealed high expression levels for three adiponectin receptor  
16 types. Immunohistochemical studies showed that two of these receptors, AdipoR1 and T-  
17 cadherin, are localized to subsets of taste receptor cells. Immunofluorescence for T-cadherin was  
18 primarily co-localized with the Type 2 taste receptor cell marker phospholipase  $\beta 2$ , suggesting  
19 that adiponectin signaling could impact sweet, bitter, or umami taste signaling. However,  
20 adiponectin null mice showed no differences in taste responsiveness compared to wildtype  
21 controls in brief-access taste testing. AAV-mediated overexpression of adiponectin in the  
22 salivary glands of adiponectin null mice did result in a small but significant increase in  
23 behavioral taste responsiveness to the fat emulsion Intralipid. Together, these results suggest that

24 salivary adiponectin can effect taste receptor cell function, though its impact on taste  
25 responsiveness and peripheral taste coding remains unclear.

26

## 27 **Introduction**

28       Recently, numerous peptides that can function as metabolic hormones, or their cognate  
29 receptors, have been detected in saliva and/or in taste receptor cells (TRCs) (Zolotukhin 2013).  
30 Of the many peptides present in the oral cavity, several appear to modulate taste-evoked  
31 behavioral responses (Dotson *et al.* 2013). For example, both glucagon-like peptide-1 (GLP-1)  
32 and glucagon signaling impact behavioral taste responsiveness to sweet stimuli (Elson *et al.*  
33 2010; Shin *et al.* 2008; Takai *et al.* 2015), angiotensin-2 impacts salt taste (Shigemura *et al.*  
34 2013), and peptide YY (PYY) signaling is implicated in the modulation of orosensory responses  
35 to lipids (La Sala *et al.* 2013). However, the full impact of peptide signaling on taste signaling  
36 remains poorly understood.

37       The anatomical proximity of salivary-expressed peptides with the peripheral gustatory  
38 system provides an opportunity for salivary peptides to impact peripheral taste function. Indeed,  
39 we previously reported that salivary PYY can modulate behavioral responsiveness to oral lipid  
40 stimuli (La Sala *et al.* 2013). Adiponectin is an anti-inflammatory adipokine primarily secreted  
41 from adipocytes into the circulation, where it affects many biological functions such as insulin  
42 sensitivity and fatty acid oxidation (Awazawa *et al.* 2011; Villarreal-Molina and Antuna-Puente  
43 2012; Yamauchi *et al.* 2002; Yoon *et al.* 2006). In both plasma and saliva, adiponectin is present  
44 in multiple oligomeric forms referred to as low, medium, high, and super high molecular weight,  
45 the latter found only in saliva (Bobbert *et al.* 2005; Lin *et al.* 2014). The origin of salivary  
46 adiponectin is not entirely clear; while it has been shown in humans to be synthesized in salivary

47 gland ductile cells (Katsiogiannis *et al.* 2006), it is likely that adiponectin is also transferred to  
48 saliva from the circulation (Wang *et al.* 2013). The function of salivary adiponectin is debated,  
49 though a few studies suggest that it influences saliva secretion and plays an anti-inflammatory  
50 role in the oral cavity (Ding *et al.* 2013; Katsiogiannis *et al.* 2010). To our knowledge, no role  
51 in gustation has been shown for adiponectin.

52 By combining RNA-seq analysis of a murine circumvallate (CV) taste bud transcriptome  
53 with immunohistochemistry (IHC) in this tissue, we identified two canonical adiponectin  
54 receptors – T-cadherin and Adipor1 – expressed in mouse TRCs (Crosson SM, *et al.* submitted  
55 for publication). The localization of these receptors to functional subsets of taste cells, along with  
56 changes in licking to lipid stimuli upon perturbation of oral adiponectin signaling, suggests a role  
57 for salivary adiponectin in the modulation of gustatory function.

58

## 59 **Materials and Methods**

### 60 Mice

61 This study was approved by the Institutional Animal Care and Use Committee (IACUC)  
62 at the University of Florida. All procedures were done in accordance with the principles of the  
63 National Research Council's guide for the Care and Use of Laboratory Animals. Mice had *ad*  
64 *libitum* access to food and water, except where otherwise noted, and were housed at 22-24°C  
65 with a 14/10 hr light/dark cycle. Wildtype (WT) C57BL/6J mice were bred in-house and  
66 B6;129-Adipoq<sup>tm1Chan</sup>/J (APN KO, which contains a null allele of the gene encoding adiponectin)  
67 mice were purchased from Jackson Labs. In some experiments, APN KO mice each received a  
68 total of  $1 \times 10^{12}$  vg of recombinant AAV vector either bilaterally in the submandibular salivary  
69 glands or via the tail vein prior to behavioral testing (for details, see (Katano *et al.* 2006)). DNA

70 was isolated from ear punches of all APN KO mice for genotyping to confirm exon2 deletion in  
71 the *Adipoq* gene. Genotyping primers are reported in Table S1.

72

### 73 Tissue Collection

74 Mice were deeply anesthetized by i.p. injection of a ketamine/xylazine mixture  
75 (200mg/kg and 10mg/kg respectively), then perfused intracardially with 4% paraformaldehyde in  
76 phosphate buffered saline (PBS, pH~7.4), followed by tissue dissection. Tissues were fixed  
77 overnight in 4% paraformaldehyde in PBS (pH~7.4), cryoprotected by incubation with 30%  
78 sucrose in PBS (pH~7.4) overnight, and frozen in O.C.T. mounting medium prior to  
79 cryosectioning. Mice used for 5-HT tissue staining were injected with 5-HTP in Lactated Ringers  
80 Solution (200 mg/kg) one hour before euthanasia to increase the amount of 5-HT in Type 3  
81 TRCs.

82

### 83 Immunohistochemistry

84 *Adiponectin receptor immunofluorescence:* Specific information regarding antibody  
85 sources, dilutions and species is located in Table 1. OCT-embedded tongues were sectioned in  
86 10-20  $\mu$ m coronal slices using a cryostat (Leica CM3050 S; Leica Microsystems, Nussloch  
87 GmbH, Germany) and mounted on Fisher Superfrost Plus slides. Immunohistochemistry was  
88 conducted using traditional indirect immunofluorescence. All washing steps were done using  
89 TBST (50 mM Tris-HCl, 0.9% NaCl, and 0.5% Tween 20, pH~7.6). Tissues were blocked for  
90 one hour at room temperature with in-house blocking buffer (5% normal donkey serum in TBST)  
91 to reduce non-specific antibody binding. Sections were then incubated overnight at 4°C with  
92 primary antibody diluted in blocking buffer, followed by secondary antibody incubation with

93 either a Donkey-anti-Rabbit IgG Alexa488 conjugate or a Donkey-anti-Goat IgG Alexa649  
94 conjugate (1:1000 dilution in blocking buffer, one hour at room temperature). All sections were  
95 counterstained with 4',6-diaminidino-2-phenylindole (DAPI) and visualized via a confocal  
96 microscopy (Leica SP5).

97 Double Labeling Immunofluorescence: Double-labeling techniques were used to co-  
98 localize T-cadherin with established TRC markers to characterize expression in specific TRC  
99 subpopulations. TRC marker information is located in Table 1 along with other primary antibody  
100 information. Double labeling experiments used primary antibodies from different host species,  
101 and thus utilized a standard indirect dual immunofluorescence staining protocol. Specifically,  
102 tissues were incubated simultaneously with both primary antibodies at 4°C overnight, followed  
103 by simultaneous incubation with two secondary antibodies for 1 hour at room temperature. Slides  
104 were washed with TBST between each incubation to remove excess antibody. Donkey-anti-  
105 Rabbit Alexa488 (1:1000), Donkey-anti-Rat Cy3 (1:200) and Donkey-anti-Goat Alexa649  
106 (1:1000) were used as secondary antibodies to detect antisera from each of the three host species  
107 used.

108

### 109 Plasmid Construction

110 Three plasmid transgene constructs were used to generate the different adiponectin rescue  
111 mouse models reported here. The pTR-Acrp30 plasmid, used to produce the AAV8-APN vector,  
112 was assembled by ligating mouse adiponectin cDNA into the pTR-UF backbone (Zolotukhin *et*  
113 *al.* 1996), as described in detail by (Shklyayev *et al.* 2003). To generate pTR-GFP-miR, we  
114 ligated miR122 and miR206 target site triplicate oligonucleotides, synthesized commercially,  
115 into the 3' untranslated region (UTR) of an inverted terminal repeat (ITR)-containing plasmid

116 backbone using standard cloning techniques. Lastly, to create pTR-APN-miR, the GFP transgene  
117 of pTR-GFP-miR was swapped with mouse adiponectin cDNA, amplified from pTR-Acrp30.  
118 Expression of each transgene cassette is driven by the ubiquitous chicken  $\beta$ -actin promotor, and  
119 all plasmid constructs were confirmed by Sanger sequencing prior to the production of AAV  
120 vectors. Primers used for cloning are reported in Table S1.

121

### 122 AAV Vector Production and Administration

123 Recombinant AAV vectors were produced in HEK 293 cells using a triple (AAV5) or  
124 double (AAV8) transfection method, and purified via Iodixanol density centrifugation as  
125 previously described (Zolotukhin *et al.* 1999). For both AAV5 preps, pHelper (Agilent cat no.  
126 240071-52) was used to supply the adenoviral helper genes and pACG2R5C (Zolotukhin *et al.*  
127 2002) was used to supply the AAV2 *rep* and AAV5 *cap* genes. For AAV8 production, a single  
128 helper plasmid (pDG8) containing both the adenoviral genes as well as the AAV2 *rep* and AAV8  
129 *cap* genes was used (Grimm *et al.* 1998). Table 2 shows the plasmids used in the transfection to  
130 produce each recombinant AAV vector. Vectors were titered using a PicoGreen-based assay  
131 described by (Piedra *et al.* 2015), and were sterile filtered before administration to animals.

132

### 133 Behavior

134 Animals: For behavioral taste testing of APN KO mice and WT mixed background  
135 controls (B6129SF2/J), adult mice (10-12 weeks old) were ordered from Jackson Labs, and  
136 allowed to acclimate to their new housing environment for 2 weeks prior to behavioral testing.  
137 During this two week acclimation period, mice were given *ad libitum* access to food and water  
138 up till the start of training/testing, and housed individually. In the second set of behavioral

139 experiments, APN KO mice (10-12 weeks old) were administered either AAV8-APN, AAV5-  
140 APN-miR, or AAV5-GFP-miR one month before the first day of training. AAV was  
141 administered either via either tail vein injection (AAV8-APN) or submandibular salivary gland  
142 cannulation (AAV5-APN-miR and AAV5-GFP-miR) as previously described (Katano *et al.*  
143 2006). After vector administration, mice were single housed and given *ad libitum* access to food  
144 and water until the start of the training/testing sessions.

145 Taste Stimuli: All tastants were prepared in 18.2 MΩ ultrapure water and dilutions were  
146 prepared fresh before each testing session. Tastants and dilution factors used are listed as  
147 follows: citric acid (CA; 0.3, 1, 3, 10, 30, and 100 mM; Sigma-Aldrich), NaCl (30, 100, 200,  
148 300, 600, and 1000 mM; Sigma-Aldrich), quinine hydrochloride (QHCl; 0.03, 0.1, 0.3, and 1, 3  
149 mM; Sigma-Aldrich), sucrose (25, 50, 100, 200, and 400 mM; Fisher Scientific), Intralipid (1.25,  
150 2.5, 5, 10, and 20%; Sigma-Aldrich). Each solution was presented at room temperature and water  
151 was used as a “no stimulus” control for each tastant.

152 Procedure: Training and testing procedures were done in a Davis Rig lickometer (Davis  
153 MS-160; DiLog Instruments, Tallahassee, FL, USA). The lickometer allows mice access to a  
154 sipper bottle containing the stimulus, and uses AC current to record each lick. The lickometer  
155 utilizes a motorized table and shutter to restrict the mice to 5 sec trials for each sipper tube. The  
156 total session times were 25 min, during which mice could initiate as many trials as they wanted.  
157 Mice were tested according to previously published protocols (Elson *et al.* 2010; Glendinning *et*  
158 *al.* 2002; La Sala *et al.* 2013). Two protocols were used; one for appetitive stimuli (sucrose and  
159 Intralipid), and one for aversive stimuli (NaCl, CA, and QHCl). For the appetitive stimuli, mice  
160 were food and water restricted (1 g food and 2 ml water) for the 23.5 hour period prior to testing.  
161 After each testing period, mice were given a 24 hour recovery period where they had *ad libitum*

162 access to food and water. For aversive stimuli, mice were put on a 23.5 hour water restriction  
163 schedule throughout the training/testing period and given *ad libitum* access to food. During  
164 aversive stimuli testing, a water rinse was presented in between each stimulus presentation in  
165 order to control for potential carryover effects. All mice were weighed daily and given 24 hr  
166 supplementary *ad libitum* access to food and water if at any time their weight dropped below  
167 85% of their pre testing weight.

168 *Data Analysis and Statistics:* For aversive stimuli, tastant/water lick ratios were obtained  
169 by dividing the average number of licks per trial for each stimulus concentration, by the average  
170 number of licks per trial to water. For appetitive stimuli, a standardized lick ratio was used to  
171 control for the impact of small changes in water licks. The standardized lick ratio is calculated by  
172 dividing the average number of licks per trial for each stimulus concentration, by the maximum  
173 potential lick rate for that animal as determined by the mean interlick interval distribution during  
174 water spout training (Glendinning *et al.* 2002). This controls for individual differences in  
175 maximal lick rates. All ratio scores were analyzed pairwise between groups by two-way analysis  
176 of variance (ANOVA). If a significant interaction was observed, a *post hoc* Holm-Sidak t-test  
177 was used ( $p < 0.05$ ) to determine if behavioral responses were significantly different between  
178 groups, for each individual concentration. Only mice that initiated at least one trial for every  
179 concentration were used in the analysis of a given stimulus. For presentation of behavioral data,  
180 curves were fit to the mean data for each group using a 2- or 3-parameter logistic function as  
181 previously described (Elson *et al.* 2010).

182

183 **Results**



184 Numerous reports have shown that taste responsiveness can be modulated by peptide  
185 signaling in taste buds. In a previous study from our group, we found that receptors for the  
186 peptide PYY are expressed in subsets of TRCs (Hurtado *et al.* 2012; La Sala *et al.* 2013). We  
187 then asked if taste buds express receptors for other peptides enriched in saliva. To initially  
188 address this question, we queried the transcriptome recently generated by us using RNA-seq of  
189 purified CV taste buds obtained from C57BL6/J mice (Crosson SM, *et al.* submitted for  
190 publication).

191 Transcripts encoding three adiponectin receptors – *Adipor1*, *Cdh13*, and *Adipor2* – were  
192 highly expressed in these taste buds (Figure 1). Average *Adipor1* expression was the highest  
193 ( $138.83 \pm 8.89$  fpkm), followed by *Cdh13* ( $93.93 \pm 12.69$  fpkm), and *Adipor2* ( $30.62 \pm 5.84$   
194 fpkm). Several other peptide receptors that have been previously reported in taste buds were also  
195 found in this dataset, albeit at lower expression levels than those seen for the adiponectin  
196 receptors; these include the insulin receptor *Insr* (Baquero and Gilbertson 2011), oxytocin  
197 receptor *Oxtr* (Sinclair *et al.* 2010), GLP-1 receptor *Glpr1* (Martin *et al.* 2009; Shin *et al.* 2008),  
198 and neuropeptide Y receptor *Npyr1* (Hurtado *et al.* 2012; Zhao *et al.* 2005).

199  
200 To validate the expression of *Adipor1*, *Adipor2*, and *Cdh13* in mouse TRCs, we  
201 performed immunohistochemistry (IHC) on cryosections containing CV papillae from C57BL6/J  
202 mice, using polyclonal antibodies against *Adipor1*, *Adipor2*, and T-cadherin (encoded by  
203 *Cdh13*). Each adiponectin receptor antisera had been previously validated in knockout mouse  
204 models (Bjursell *et al.* 2007; Denzel *et al.* 2010). Both *Adipor1* and T-cadherin immunolocalize  
205 to taste buds (Figure 2A, C). *Adipor2* however, does not immunolocalize to taste buds; rather, it  
206 is found only in the surrounding tissues (Figure 2B). Co-labeling sections for *Adipor2* and

207 cytokeratin 8 (Krt8), a general TRC marker (Mbiene and Roberts 2003), confirmed that taste  
208 buds do not express Adipor2 and suggests that the presence of Adipor2 in the RNA-seq database  
209 was due to contamination of the taste bud samples with surrounding non-taste tissue.

210

211 Mammalian taste buds are composed of multiple TRC types, each of which play different  
212 roles in the detection and transmission of taste information (Chaudhari and Roper 2010). To gain  
213 insight into the roles of adiponectin signaling in TRCs, we co-localized T-cadherin with  
214 established markers for the three main TRC subtypes (Figures 3 & 4): NTPDase2 (Type 1 TRCs,  
215 which are thought to play a supporting role; (Vandenbeuch *et al.* 2013)), PLC $\beta$ 2 and the G  
216 protein  $\alpha$ -subunit gustducin (sweet, bitter, and/or umami-responsive TRCs; (Ming *et al.* 1999;  
217 Miyoshi *et al.* 2001), and 5-HT and NCAM (sour-sensitive Type 3 TRCs; (Huang *et al.* 2008;  
218 Yee *et al.* 2001). Host species antibody constraints made dual staining difficult for Adipor1. T-  
219 cadherin immunostaining largely colocalized with both PLC $\beta$ 2 and gustducin, suggesting  
220 expression of this adiponectin receptor primarily in a major subset of Type 2 TRCs (Figure 3). T-  
221 cadherin was not co-expressed with the Type 3 TRC markers 5-HT or NCAM, though a small  
222 subset of NTPDase2-expressing Type 1 TRCs showed some T-cadherin staining (Figure 4). We  
223 also measured the co-localization of T-cadherin and these TRC markers by correlation analysis  
224 (Costes *et al.* 2004). Consistent with the visual analysis of the IHC co-staining, calculated  
225 Pearson's correlation coefficients (Table 3) indicate that T-cadherin is primarily expressed in  
226 Type 2 TRCs.

227

228 We next asked if adiponectin signaling impacts taste behaviors. We first assessed taste  
229 responses in APN KO mice, and their WT controls (B6:129 SF2/J mice) using brief access taste

230 testing. No significant differences in taste responses to sucrose, QHCL, NaCl, CA, or Intralipid  
231 were seen between APN KO and control mice (Figure 5).

232  
233 To specifically test the effects of salivary and circulating adiponectin, we generated both  
234 a salivary gland-specific adiponectin rescue model and, a global overexpressing adiponectin  
235 rescue model using recombinant adeno-associated viral (rAAV) vectors in APN KO mice. Since  
236 the tissue tropism of AAV serotypes is not well characterized in the salivary gland, we first  
237 performed several pilot studies. We chose to focus on AAV serotypes 2, 5, and 8 because AAV2  
238 and AAV5 will reportedly transduce the salivary gland (Katano *et al.* 2006), and AAV8 is a  
239 generally robust vector in mice. Mice received a total of  $1 \times 10^{12}$  vg of either AAV 2, 5, or 8 (each  
240 expressing a GFP reporter under the chicken  $\beta$ -actin promoter) bilaterally in the submandibular  
241 gland (Figure 6). Both AAV5 and AAV8 displayed high salivary gland transduction (Figure  
242 6B,C). However, AAV8 also had high transduction in the liver (Figure 6E), a common off-target  
243 tissue for AAVs. Because of the unintended liver transduction observed with AAV8 vectors, we  
244 decided to use AAV5 as the vector for our salivary adiponectin rescue and AAV8 as the vector  
245 for the global adiponectin rescue. To further increase the specificity of the AAV5 vector for  
246 salivary gland transduction, we included micro RNA target sites for miR122 and miR206, which  
247 are liver and skeletal muscle specific, respectively (Geisler *et al.* 2013). Using this micro RNA  
248 target site containing vector, we were able to abolish off target expression in the liver (Figure 7).

249  
250 APN KO mice with rescued salivary adiponectin expression were generated by  
251 administering  $1 \times 10^{12}$  vg of AAV5-APN-miR to the submandibular salivary glands of APN KO  
252 mice via ductile cannulation. AAV5-GFP-miR was injected into the salivary glands of APN KO

253 mice as a negative control. A global adiponectin rescue model (positive control) was generated  
254 by administering  $1 \times 10^{12}$  vg of AAV8-APN systemically to APN KO mice via tail vein injection.  
255 One month after vector administration, we performed brief-access taste response testing for  
256 Intralipid, sucrose, and QHCL (Figure 8). We observed a modest, yet significant increase in the  
257 behavioral responses to Intralipid ( $p < 0.05$ ), but not sucrose or QHCL, in the salivary  
258 adiponectin rescue mice compared to APN KO control mice (Figure 8A). The response of the  
259 global adiponectin rescue was not significantly different from that of the APN KO control mice  
260 for any of the tastants tested (Figure 8B).

261  
262 Finally, upon completion of behavioral testing, saliva and blood samples were drawn for  
263 adiponectin quantification by ELISA (Figure 9). As expected, plasma and saliva samples from  
264 APN KO mice were negative for adiponectin (Figure 9C). Mice receiving the AAV5-APN-miR  
265 vector show diminished circulating levels of adiponectin ( $11.66 \pm 10.32$  ng/ml; Figure 9A),  
266 approximately 1000-fold less than seen in WT mice ( $6.088$   $\mu$ g/ml; Figure 9C) and less likely to  
267 have a biological impact (Frühbeck *et al.* 2017). In saliva however, they express adiponectin at  
268  $3.94 \pm 4.07$   $\mu$ g/ml (Figure 9A), similar to what is expected in WT mice ( $0.851$  ng/ml; Figure 9C)  
269 and humans (Lin *et al.* 2014). By contrast, mice receiving systemic AAV8-APN showed much  
270 higher plasma levels of adiponectin ( $744.52 \pm 365.67$   $\mu$ g/ml), but significantly lower levels in  
271 saliva ( $1.80 \pm 0.83$  ng/ml; Figure 9B).

272

## 273 Discussion

274 TRCs and associated taste nerves express a diversity of receptors for peptide hormones  
275 related to the control of metabolism and satiety. The expression of two adiponectin receptors –

276 Adipor1 and T-cadherin – in TRCs suggests an additional degree of complexity for modulation  
277 of TRC function by peptides acting as autocrine, paracrine, and/or endocrine factors. The  
278 expression patterns of different peptide receptors (as well as their peptide ligands) can vary  
279 significantly. For example, glucagon receptors are expressed in PLC $\beta$ 2-positive Type 2 TRCs  
280 (Elson *et al.* 2010); oxytocin receptors are found in glial-like Type 1 cells (Sinclair *et al.* 2010);  
281 and the receptor for GLP-1 is localized to afferent nerve terminals innervating taste buds (Shin *et*  
282 *al.* 2008). We immunolocalized T-cadherin to a subset of PLC $\beta$ 2-positive, G $\alpha$ -gustducin-positive  
283 TRCs, suggesting that adiponectin might affect responses to taste stimuli transduced by these  
284 signaling proteins. We also noted some T-cadherin-expressing cells that lacked immunostaining  
285 for PLC $\beta$ 2, but also for markers of Type 1 and Type 3 TRCs. One possibility is that PLC $\beta$ 2-  
286 negative, T-cadherin-positive TRCs represent an earlier stage of Type 2 cell differentiation and  
287 have not yet begun to express PLC $\beta$ 2. Due to multiple antibody constraints (e.g., species  
288 compatibility), we were not able to fully resolve the exact expression patterns of each  
289 adiponectin receptor in taste buds using IHC alone. Transcriptomic analyses of individual TRCs  
290 would be very useful for fully elucidating the expression profile of adiponectin receptors in  
291 TRCs.

292 While transcriptomic analysis of CV taste buds indicated that all three genes encoding  
293 canonical adiponectin receptors – *Adipor1*, *Adipor2*, and *Cdh13* – are expressed in TRCs,  
294 immunohistochemical staining showed that *Adipor2* is excluded from TRCs and is instead  
295 localized to surrounding non-taste tissue. The discrepancy between the two techniques is not  
296 wholly surprising, as the taste buds used in the RNA-seq study were collected by manual  
297 dissection making low level contamination with non-taste tissue likely. Furthermore, differential

298 localization of Adipor1 and Adipor2 in lingual tissue is consistent with observations in other  
299 tissues (Beylot *et al.* 2006).

300         Several peptides that affect blood glucose homeostasis, satiation, gastric emptying and  
301 secretion of digestive enzymes – including PYY, GLP-1 and glucagon (Batterham *et al.* 2002;  
302 Batterham *et al.* 2006; Hellström *et al.* 2004; Kieffer and Habener 1999; Nadkarni *et al.* 2014) –  
303 are produced in the oral cavity and impact taste responsiveness (Dotson *et al.* 2013; Elson *et al.*  
304 2010; La Sala *et al.* 2013; Martin *et al.* 2009; Shin *et al.* 2008; Takai *et al.* 2015). While the  
305 majority of these peptides are produced in taste buds (Dotson *et al.* 2013), a few including leptin  
306 (Kawai *et al.* 2000), PYY (Acosta *et al.* 2011; La Sala *et al.* 2013), and oxytocin (Sinclair *et al.*  
307 2010) are produced in distant tissues and likely reach the taste buds through saliva or the  
308 bloodstream. Adiponectin appears to fit this category, as well. This peptide has been widely  
309 studied because it plays critical roles in adipocyte metabolism, fatty acid oxidation, and insulin  
310 sensitivity (Lihn *et al.* 2005). Animal studies have shown that exogenous adiponectin  
311 administration leads to weight loss and insulin sensitization, and low levels of circulating  
312 adiponectin are correlated with metabolic syndrome in obese humans (Lin *et al.* 2007; Matafome  
313 *et al.* 2014; Shklyayev *et al.* 2003). However, adiponectin was not previously known to target the  
314 gustatory system.

315         Because the primary function of TRCs is to detect tastants and transduce this information  
316 to afferent gustatory nerve fibers, we reasoned that adiponectin may modulate taste  
317 responsiveness. Surprisingly, APN KO mice and their wildtype controls showed equivalent taste  
318 behavior responses to prototypical taste stimuli. However, the elimination of adiponectin may be  
319 insufficient to alter key downstream cellular signaling pathways in mice, as there may be  
320 compensatory mechanisms that are able to supplement for the lack of adiponectin (Ma *et al.*

2002). To address this issue, we performed the same behavioral testing in APN KO mice that had been rescued with rAAV-mediated expression of adiponectin either globally or specifically in salivary glands. Mice receiving the salivary adiponectin rescue (but not the global rescue mice or control APN KO mice) showed a modest but significant increase in behavioral responsiveness to Intralipid. Whether lipids elicit a distinct taste perceptual quality remains controversial, but they clearly can impact gustatory responses (Ozdener *et al.* 2014). Several putative “fat taste” receptors have been suggested in rodent taste buds, including the fatty acid translocase CD36 and the fatty acid-sensitive G protein-coupled receptor GPR120 (Cartoni *et al.* 2010). Interestingly, adiponectin has been reported to upregulate CD36 expression in cardiomyocytes via activation of the AMPK pathway (Chabowski *et al.* 2006; Fang *et al.* 2010). It is unclear whether a similar response may be present in TRCs.

Viral-mediated expression peptide hormones may be a useful strategy for modulating taste in a clinical context. By targeting expression to just the salivary glands, salivary adiponectin expression reached wildtype levels while circulating adiponectin levels were 1000-fold less than those in a WT mouse (Frühbeck *et al.* 2017). However, we were unable to completely limit adiponectin expression to either blood or saliva in either rescue model. For the salivary rescue model to limit off-target expression, we both directly injected AAV vectors driven by the chicken  $\beta$ -actin promoter into the salivary gland, and included micro RNAs for miR122 and miR206 which are liver and skeletal muscle specific, respectively. Even so, it was obvious that viral particles were still entering the circulation. Circulating adiponectin seen in this model could also be due to limited off-target transduction of non-salivary tissue, or the transduced salivary cells themselves may secrete adiponectin nonspecifically into both the blood and the saliva. In the global adiponectin rescue model, circulating adiponectin is likely transferred into saliva

344 (Wang *et al.* 2013). Altogether, however, the salivary rescue model provided an impressive  
345 degree of expression control.

346 In summary we have shown that adiponectin receptors Adipor1 and T-cadherin are  
347 expressed in subpopulations of TRCs and that saliva-derived adiponectin can positively  
348 modulate taste behavioral responsiveness to Intralipid under certain conditions. A clearer  
349 understanding of the mechanisms by which adiponectin impacts TRC function awaits further  
350 studies of both oral lipid sensing and adiponectin-dependent signaling in the peripheral gustatory  
351 system.

352

### 353 **Acknowledgements**

354 Thanks to the UF Center for Smell and Taste's Chemosensory Behavior core for access  
355 to behavioral testing instruments. Thanks to Dr. Xiao-Rong Peng for their generous donation of  
356 both Adipor1 and Adipor2 antibodies.

357

### 358 **Financial Conflict of Interest**

359 At the time of study, author C. D. Dotson was employed at the University of Florida. He  
360 has since been hired at the Coca Cola company, and has provided only editorial guidance since  
361 his hire at Coca Cola. This change of employment in no way influenced funding of the study or  
362 the results obtained. All other authors have no conflict of interests to declare.

363

### 364 **Funding Sources**

365 NIH NIDCD F31 DC015751 and R01 DC012819



366 **References**

- 367 Acosta A, Hurtado MD, Gorbatyuk O, La Sala M, Duncan D, Aslanidi G, Campbell-Thompson  
368 M, Zhang L, Herzog H, Voutetakis A, Baum BJ, Zolotukhin S. 2011. Salivary PYY: a putative  
369 bypass to satiety. *PLoS One* 6: e26137.
- 370 Awazawa M, Ueki K, Inabe K, Yamauchi T, Kubota N, Kaneko K, Kobayashi M, Iwane A,  
371 Sasako T, Okazaki Y, Ohsugi M, Takamoto I, Yamashita S, Asahara H, Akira S, Kasuga M,  
372 Kadowaki T. 2011. Adiponectin enhances insulin sensitivity by increasing hepatic IRS-2  
373 expression via a macrophage-derived IL-6-dependent pathway. *Cell Metab* 13: 401-412.
- 374 Baquero AF, Gilbertson TA. 2011. Insulin activates epithelial sodium channel (ENaC) via  
375 phosphoinositide 3-kinase in mammalian taste receptor cells. *Am J Physiol Cell Physiol* 300:  
376 C860-871.
- 377 Batterham RL, Cowley MA, Small CJ, Herzog H, Cohen MA, Dakin CL, Wren AM, Brynes AE,  
378 Low MJ, Ghatei MA, Cone RD, Bloom SR. 2002. Gut hormone PYY(3-36) physiologically  
379 inhibits food intake. *Nature* 418: 650-654.
- 380 Batterham RL, Heffron H, Kapoor S, Chivers JE, Chandarana K, Herzog H, Le Roux CW,  
381 Thomas EL, Bell JD, Withers DJ. 2006. Critical role for peptide YY in protein-mediated  
382 satiation and body-weight regulation. *Cell Metab* 4: 223-233.
- 383 Beylot M, Pinteaur C, Peroni O. 2006. Expression of the adiponectin receptors AdipoR1 and  
384 AdipoR2 in lean rats and in obese Zucker rats. *Metabolism* 55: 396-401.
- 385 Bjursell M, Ahnmark A, Bohlooly-Y M, William-Olsson L, Rhedin M, Peng XR, Ploj K, Gerdin  
386 AK, Arnerup G, Elmgren A, Berg AL, Oscarsson J, Lindén D. 2007. Opposing effects of  
387 adiponectin receptors 1 and 2 on energy metabolism. *Diabetes* 56: 583-593.
- 388 Bobbert T, Rochlitz H, Wegewitz U, Akpulat S, Mai K, Weickert MO, Möhlig M, Pfeiffer AF,  
389 Spranger J. 2005. Changes of adiponectin oligomer composition by moderate weight reduction.  
390 *Diabetes* 54: 2712-2719.
- 391 Cartoni C, Yasumatsu K, Ohkuri T, Shigemura N, Yoshida R, Godinot N, le Coutre J, Ninomiya  
392 Y, Damak S. 2010. Taste preference for fatty acids is mediated by GPR40 and GPR120. *J*  
393 *Neurosci* 30: 8376-8382.
- 394 Chabowski A, Momken I, Coort SL, Calles-Escandon J, Tandon NN, Glatz JF, Luiken JJ, Bonen  
395 A. 2006. Prolonged AMPK activation increases the expression of fatty acid transporters in  
396 cardiac myocytes and perfused hearts. *Mol Cell Biochem* 288: 201-212.
- 397 Chaudhari N, Roper SD. 2010. The cell biology of taste. *J Cell Biol* 190: 285-296.
- 398 Costes SV, Daelemans D, Cho EH, Dobbin Z, Pavlakis G, Lockett S. 2004. Automatic and  
399 quantitative measurement of protein-protein colocalization in live cells. *Biophys J* 86: 3993-  
400 4003.

- 401 Denzel MS, Scimia MC, Zumstein PM, Walsh K, Ruiz-Lozano P, Ranscht B. 2010. T-cadherin  
402 is critical for adiponectin-mediated cardioprotection in mice. *J Clin Invest* 120: 4342-4352.
- 403 Ding C, Li L, Su YC, Xiang RL, Cong X, Yu HK, Li SL, Wu LL, Yu GY. 2013. Adiponectin  
404 increases secretion of rat submandibular gland via adiponectin receptors-mediated AMPK  
405 signaling. *PLoS One* 8: e63878.
- 406 Dotson CD, Geraedts MC, Munger SD. 2013. Peptide regulators of peripheral taste function.  
407 *Semin Cell Dev Biol* 24: 232-239.
- 408 Elson AE, Dotson CD, Egan JM, Munger SD. 2010. Glucagon signaling modulates sweet taste  
409 responsiveness. *FASEB J* 24: 3960-3969.
- 410 Fang X, Palanivel R, Cresser J, Schram K, Ganguly R, Thong FS, Tuinei J, Xu A, Abel ED,  
411 Sweeney G. 2010. An APPL1-AMPK signaling axis mediates beneficial metabolic effects of  
412 adiponectin in the heart. *Am J Physiol Endocrinol Metab* 299: E721-729.
- 413 Frühbeck G, Catalán V, Rodríguez A, Ramírez B, Becerril S, Portincasa P, Gómez-Ambrosi J.  
414 2017. Normalization of adiponectin concentrations by leptin replacement in ob/ob mice is  
415 accompanied by reductions in systemic oxidative stress and inflammation. *Sci Rep* 7: 2752.
- 416 Geisler A, Schön C, Gröbl T, Pinkert S, Stein EA, Kurreck J, Vetter R, Fechner H. 2013.  
417 Application of mutated miR-206 target sites enables skeletal muscle-specific silencing of  
418 transgene expression of cardiotropic AAV9 vectors. *Mol Ther* 21: 924-933.
- 419 Glendinning JJ, Gresack J, Spector AC. 2002. A high-throughput screening procedure for  
420 identifying mice with aberrant taste and oromotor function. *Chem Senses* 27: 461-474.
- 421 Grimm D, Kern A, Rittner K, Kleinschmidt JA. 1998. Novel tools for production and  
422 purification of recombinant adenoassociated virus vectors. *Hum Gene Ther* 9: 2745-2760.
- 423 Hellström PM, Geliebter A, Näslund E, Schmidt PT, Yahav EK, Hashim SA, Yeomans MR.  
424 2004. Peripheral and central signals in the control of eating in normal, obese and binge-eating  
425 human subjects. *Br J Nutr* 92 Suppl 1: S47-57.
- 426 Huang YA, Maruyama Y, Stimac R, Roper SD. 2008. Presynaptic (Type III) cells in mouse taste  
427 buds sense sour (acid) taste. *J Physiol* 586: 2903-2912.
- 428 Hurtado MD, Acosta A, Riveros PP, Baum BJ, Ukhanov K, Brown AR, Dotson CD, Herzog H,  
429 Zolotukhin S. 2012. Distribution of Y-receptors in murine lingual epithelia. *PLoS One* 7:  
430 e46358.
- 431 Katano H, Kok MR, Cotrim AP, Yamano S, Schmidt M, Afione S, Baum BJ, Chiorini JA. 2006.  
432 Enhanced transduction of mouse salivary glands with AAV5-based vectors. *Gene Ther* 13: 594-  
433 601.
- 434 Katsiogiannis S, Kapsogeorgou EK, Manoussakis MN, Skopouli FN. 2006. Salivary gland  
435 epithelial cells: a new source of the immunoregulatory hormone adiponectin. *Arthritis Rheum*  
436 54: 2295-2299.

- 437 Katsiogiannis S, Tenta R, Skopouli FN. 2010. Activation of AMP-activated protein kinase by  
438 adiponectin rescues salivary gland epithelial cells from spontaneous and interferon-gamma-  
439 induced apoptosis. *Arthritis Rheum* 62: 414-419.
- 440 Kawai K, Sugimoto K, Nakashima K, Miura H, Ninomiya Y. 2000. Leptin as a modulator of  
441 sweet taste sensitivities in mice. *Proc Natl Acad Sci U S A* 97: 11044-11049.
- 442 Kieffer TJ, Habener JF. 1999. The glucagon-like peptides. *Endocr Rev* 20: 876-913.
- 443 La Sala MS, Hurtado MD, Brown AR, Bohórquez DV, Liddle RA, Herzog H, Zolotukhin S,  
444 Dotson CD. 2013. Modulation of taste responsiveness by the satiation hormone peptide YY.  
445 *FASEB J* 27: 5022-5033.
- 446 Lihn AS, Pedersen SB, Richelsen B. 2005. Adiponectin: action, regulation and association to  
447 insulin sensitivity. *Obes Rev* 6: 13-21.
- 448 Lin H, Maeda K, Fukuhara A, Shimomura I, Ito T. 2014. Molecular expression of adiponectin in  
449 human saliva. *Biochem Biophys Res Commun* 445: 294-298.
- 450 Lin HV, Kim JY, Poci A, Rossetti L, Shapiro L, Scherer PE, Accili D. 2007. Adiponectin  
451 resistance exacerbates insulin resistance in insulin receptor transgenic/knockout mice. *Diabetes*  
452 56: 1969-1976.
- 453 Ma K, Cabrero A, Saha PK, Kojima H, Li L, Chang BH, Paul A, Chan L. 2002. Increased beta -  
454 oxidation but no insulin resistance or glucose intolerance in mice lacking adiponectin. *J Biol*  
455 *Chem* 277: 34658-34661.
- 456 Martin B, Dotson CD, Shin YK, Ji S, Drucker DJ, Maudsley S, Munger SD. 2009. Modulation of  
457 taste sensitivity by GLP-1 signaling in taste buds. *Ann N Y Acad Sci* 1170: 98-101.
- 458 Matafome P, Rodrigues T, Pereira A, Letra L, Azevedo H, Paixão A, Silvério M, Almeida A,  
459 Sena C, Seíça R. 2014. Long-term globular adiponectin administration improves adipose tissue  
460 dysmetabolism in high-fat diet-fed Wistar rats. *Arch Physiol Biochem* 120: 147-157.
- 461 Mbiene JP, Roberts JD. 2003. Distribution of keratin 8-containing cell clusters in mouse  
462 embryonic tongue: evidence for a prepattern for taste bud development. *J Comp Neurol* 457:  
463 111-122.
- 464 Ming D, Ninomiya Y, Margolskee RF. 1999. Blocking taste receptor activation of gustducin  
465 inhibits gustatory responses to bitter compounds. *Proc Natl Acad Sci U S A* 96: 9903-9908.
- 466 Miyoshi MA, Abe K, Emori Y. 2001. IP(3) receptor type 3 and PLCbeta2 are co-expressed with  
467 taste receptors T1R and T2R in rat taste bud cells. *Chem Senses* 26: 259-265.
- 468 Nadkarni P, Chepurny OG, Holz GG. 2014. Regulation of glucose homeostasis by GLP-1. *Prog*  
469 *Mol Biol Transl Sci* 121: 23-65.
- 470 Ozdener MH, Subramaniam S, Sundaresan S, Sery O, Hashimoto T, Asakawa Y, Besnard P,  
471 Abumrad NA, Khan NA. 2014. CD36- and GPR120-mediated Ca<sup>2+</sup> signaling in human taste

- 472 bud cells mediates differential responses to fatty acids and is altered in obese mice.  
473 *Gastroenterology* 146: 995-1005.
- 474 Piedra J, Ontiveros M, Miravet S, Penalva C, Monfar M, Chillon M. 2015. Development of a  
475 rapid, robust, and universal picogreen-based method to titer adeno-associated vectors. *Hum Gene*  
476 *Ther Methods* 26: 35-42.
- 477 Shigemura N, Iwata S, Yasumatsu K, Ohkuri T, Horio N, Sanematsu K, Yoshida R, Margolskee  
478 RF, Ninomiya Y. 2013. Angiotensin II modulates salty and sweet taste sensitivities. *J Neurosci*  
479 33: 6267-6277.
- 480 Shin YK, Martin B, Golden E, Dotson CD, Maudsley S, Kim W, Jang HJ, Mattson MP, Drucker  
481 DJ, Egan JM, Munger SD. 2008. Modulation of taste sensitivity by GLP-1 signaling. *J*  
482 *Neurochem* 106: 455-463.
- 483 Shklyaev S, Aslanidi G, Tennant M, Prima V, Kohlbrenner E, Kroutov V, Campbell-Thompson  
484 M, Crawford J, Shek EW, Scarpace PJ, Zolotukhin S. 2003. Sustained peripheral expression of  
485 transgene adiponectin offsets the development of diet-induced obesity in rats. *Proc Natl Acad Sci*  
486 *U S A* 100: 14217-14222.
- 487 Sinclair MS, Perea-Martinez I, Dvoryanchikov G, Yoshida M, Nishimori K, Roper SD,  
488 Chaudhari N. 2010. Oxytocin signaling in mouse taste buds. *PLoS One* 5: e11980.
- 489 Takai S, Yasumatsu K, Inoue M, Iwata S, Yoshida R, Shigemura N, Yanagawa Y, Drucker DJ,  
490 Margolskee RF, Ninomiya Y. 2015. Glucagon-like peptide-1 is specifically involved in sweet  
491 taste transmission. *FASEB J* 29: 2268-2280.
- 492 Vandenbeuch A, Anderson CB, Parnes J, Enjyoji K, Robson SC, Finger TE, Kinnamon SC.  
493 2013. Role of the ectonucleotidase NTPDase2 in taste bud function. *Proc Natl Acad Sci U S A*  
494 110: 14789-14794.
- 495 Villarreal-Molina MT, Antuna-Puente B. 2012. Adiponectin: anti-inflammatory and  
496 cardioprotective effects. *Biochimie* 94: 2143-2149.
- 497 Wang J, Liang Y, Wang Y, Cui J, Liu M, Du W, Xu Y. 2013. Computational prediction of  
498 human salivary proteins from blood circulation and application to diagnostic biomarker  
499 identification. *PLoS One* 8: e80211.
- 500 Yamauchi T, Kamon J, Minokoshi Y, Ito Y, Waki H, Uchida S, Yamashita S, Noda M, Kita S,  
501 Ueki K, Eto K, Akanuma Y, Froguel P, Foufelle F, Ferre P, Carling D, Kimura S, Nagai R, Kahn  
502 BB, Kadowaki T. 2002. Adiponectin stimulates glucose utilization and fatty-acid oxidation by  
503 activating AMP-activated protein kinase. *Nat Med* 8: 1288-1295.
- 504 Yee CL, Yang R, Böttger B, Finger TE, Kinnamon JC. 2001. "Type III" cells of rat taste buds:  
505 immunohistochemical and ultrastructural studies of neuron-specific enolase, protein gene  
506 product 9.5, and serotonin. *J Comp Neurol* 440: 97-108.
- 507 Yoon MJ, Lee GY, Chung JJ, Ahn YH, Hong SH, Kim JB. 2006. Adiponectin increases fatty  
508 acid oxidation in skeletal muscle cells by sequential activation of AMP-activated protein kinase,

509 p38 mitogen-activated protein kinase, and peroxisome proliferator-activated receptor alpha.  
510 Diabetes 55: 2562-2570.

511 Zhao FL, Shen T, Kaya N, Lu SG, Cao Y, Herness S. 2005. Expression, physiological action,  
512 and coexpression patterns of neuropeptide Y in rat taste-bud cells. Proc Natl Acad Sci U S A  
513 102: 11100-11105.

514 Zolotukhin S. 2013. Metabolic hormones in saliva: origins and functions. Oral Dis 19: 219-229.

515 Zolotukhin S, Byrne BJ, Mason E, Zolotukhin I, Potter M, Chesnut K, Summerford C, Samulski  
516 RJ, Muzyczka N. 1999. Recombinant adeno-associated virus purification using novel methods  
517 improves infectious titer and yield. Gene Ther 6: 973-985.

518 Zolotukhin S, Potter M, Hauswirth WW, Guy J, Muzyczka N. 1996. A "humanized" green  
519 fluorescent protein cDNA adapted for high-level expression in mammalian cells. J Virol 70:  
520 4646-4654.

521 Zolotukhin S, Potter M, Zolotukhin I, Sakai Y, Loiler S, Fraitjes TJ, Chiodo VA, Phillipsberg T,  
522 Muzyczka N, Hauswirth WW, Flotte TR, Byrne BJ, Snyder RO. 2002. Production and  
523 purification of serotype 1, 2, and 5 recombinant adeno-associated viral vectors. Methods 28: 158-  
524 167.

525

526 **Table 1.** Host species, dilution, and supplier information for primary antibodies used in IHC  
 527 experiments.

| 1° Antibody             | Immunogen                                                                                             | Host   | Supplier                                                                                                | Dilution |
|-------------------------|-------------------------------------------------------------------------------------------------------|--------|---------------------------------------------------------------------------------------------------------|----------|
| AdipoR1                 | Synthetic peptide sequence corresponding to amino acids 14-32 of human AdipoR1<br>GAPASNREADTVLAEELGP | Rabbit | Dr. Xiao-Rong Peng<br>(Bjursell <i>et al.</i> 2007)                                                     | 1:200    |
| AdipoR2                 | Synthetic peptide sequence corresponding to amino acids 11-29 of human AdipoR2<br>CSRTPEPDIRLRKGHQLDG | Rabbit | Dr. Xiao-Rong Peng<br>(Bjursell <i>et al.</i> 2007)                                                     | 1:200    |
| T-Cadherin              | Recombinant human Cadherin-13                                                                         | Goat   | R&D systems<br>(Minneapolis, MA,<br>U.S.A. AF3264)                                                      | 1:500    |
| NTPDase2                | Mouse NTPDase2                                                                                        | Rabbit | J. Sévigny, Université<br>Laval, Quebec,<br>Canada. #mN2-36I6                                           | 1:500    |
| PLC $\beta$ 2           | Synthetic peptide corresponding to the C-terminal region of human PLC $\beta$ 2                       | Rabbit | Santa Cruz<br>Biotechnologies<br>(Dallas, TX, U.S.A.<br>cat No. sc-206)                                 | 1:500    |
| G $\alpha$<br>Gustducin | Synthetic peptide corresponding to an internal region of rat G $\alpha$ Gustducin                     | Rabbit | Santa Cruz<br>Biotechnologies<br>(Dallas, TX, U.S.A.<br>cat No. sc-395)                                 | 1:500    |
| NCAM                    | Purified chicken NCAM                                                                                 | Rabbit | Millipore (Temecula,<br>CA, USA; cat. No.<br>AB5032)                                                    | 1:500    |
| 5-HT                    | Serotonin conjugated to BSA                                                                           | Rat    | Millipore (Temecula,<br>CA, USA; cat. No.<br>MAB352 clone<br>YC5/45)                                    | 1:500    |
| Krt8                    | Mouse Cytokeratin 8/18                                                                                | Rat    | University of Iowa<br>Developmental<br>Studies Hybridoma<br>Bank (antibody<br>Registry ID<br>AB_531826) | 1:500    |

529 **Table 2.** Plasmid constructs used in the production of rAAV vectors.

| Vector       | AAV plasmid | Helper plasmid | Transgene plasmid | Gene expressed            |
|--------------|-------------|----------------|-------------------|---------------------------|
| AAV5-GFP-miR | pACG2R5C    | pHelper        | pTR-GFP-miR       | Green Fluorescent Protein |
| AAV5-APN-miR | pACG2R5C    | pHelper        | pTR-APN-miR       | Adiponectin               |
| AAV8-APN     | *pDG8       | *pDG8          | pTR-Acrp30        | Adiponectin               |

530 \* contains both helper genes and AAV *rep/cap* genes

531 **Table 3.** Co-localization analysis of T-cadherin and TRC markers by Pearson's correlation.

| Adiponectin receptor | TRC marker    | Taste buds counted | Pearson's correlation coefficient |
|----------------------|---------------|--------------------|-----------------------------------|
| T-cadherin           | NTPDase2      | 12                 | 0.136                             |
| T-cadherin           | PLC $\beta$ 2 | 11                 | 0.461                             |
| T-cadherin           | Gustducin     | 8                  | 0.451                             |
| T-cadherin           | 5-HT          | 2                  | -0.012                            |
| T-cadherin           | NCAM          | 4                  | 0.052                             |

532



533 **Figure 1.** Gene expression levels of metabolic hormone and peptide receptors in WT TRCs.

534 Expression levels for select receptors as determined by RNA-seq of WT murine CV taste buds.

535 The three highest expressing transcripts – *Adipor1*, *Cdh13*, and *Adipor2* – are all receptors for

536 adiponectin. A total of 6 biological replicates (N = 6) were used for analysis.

537

538 **Figure 2.** Expression of *Adipor1* and T-cadherin in CV TRCs. IHC staining of WT murine CV

539 sections for all three adiponectin receptors, *Adipor1* (A, D), *Adipor2* (B, E), and T-cadherin (C,

540 F). *Adipor1* (A, D) and T-cadherin (C, F) are expressed in CV taste buds (white dotted circle)

541 while *Adipor2* (B, E) is expressed in surrounding tissue. *Adipor2* sections were costained with

542 *Krt8* (B, E), a general taste cell marker. Scale bar is 20 microns.

543

544 **Figure 3.** IHC staining of T-cadherin with established markers for sweet, bitter, and/or umami

545 responsive TRCs. T-cadherin localizes to cells expressing PLC $\beta$ 2 (C), and cells expressing

546 gustducin (F). Single channel images of T-cadherin (A) and PLC $\beta$ 2 (B) as well as T-cadherin (D)

547 and gustducin (E) are shown for reference. Scale bar is 20 microns.

548

549 **Figure 4.** IHC staining of T-cadherin with established markers for supporting and sour

550 responsive TRCs. T-cadherin does not localize to sour responsive TRCs (F, I) and has minimal

551 localization to supporting TRCs (C). Single channel images of T-cadherin (A) and NTPDase2

552 (B), T-cadherin (D) and 5-HT (E), and T-cadherin (G) and NCAM (H) are shown for reference.

553 Scale bar is 20 microns.

554

555 **Figure 5.** Behavioral taste response comparison of APN KO and WT control mice. Brief-access  
556 taste response testing of APN KO (red) and control (black) mice for CA, NaCl, QHCL, sucrose,  
557 and Intralipid. No significant difference was observed between groups for any of the stimuli  
558 tested, as determined by two-way ANOVA ( $p > 0.05$ ). A total of 8 mice were used in each group.  
559

560 **Figure 6.** Salivary gland tropism of AAVs 2, 8, and 5. GFP expression in salivary glands (A, B,  
561 C) 1 month after AAV2 (A), AAV8 (B), or AAV5 (C) administration in WT mice. Off target  
562 liver expression was observed for all vectors AAV2 (D), AAV8 (E), and AAV5 (F). Scale bar is  
563 50 microns.

564

565 **Figure 7.** Negligible off target liver expression is observed with the inclusion of miR122 and  
566 miR206 TS into the AAV5 vector. GFP transduction in salivary glands (A) and liver (B) one  
567 month after vector administration was used as a marker of transduction.

568

569 **Figure 8.** Behavioral taste response testing of salivary and global adiponectin rescue models. A)  
570 Brief-access taste response testing of salivary adiponectin rescue (red) and APN KO (black) for  
571 sucrose, Intralipid, and QHCL. B) Brief-access taste response testing of global adiponectin  
572 rescue (blue) and APN KO (black) for sucrose, Intralipid, and QHCL. \*Significance in taste  
573 response was determined by two-way ANOVA and *post hoc* Holm-Sidak t-test with  $p < 0.05$ .

574

575 **Figure 9.** Quantification of adiponectin levels in rescue models by ELISA. A) Saliva (blue) and  
576 plasma (red) adiponectin levels of salivary adiponectin rescue mice. B) Saliva (blue) and plasma  
577 (red) adiponectin levels of global adiponectin rescue mice. C) Saliva (blue) and plasma (red)

578 adiponectin levels in a single WT (C57BL/6) mouse, as well as confirmation of adiponectin loss  
579 in APN KO saliva and plasma.

# Metabolic Hormone Receptors

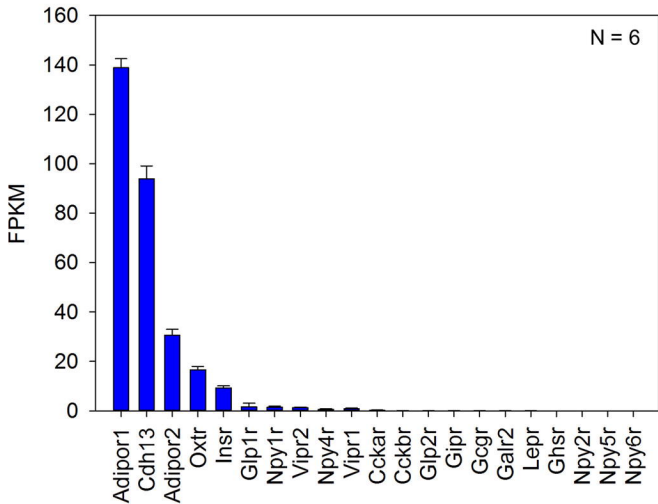

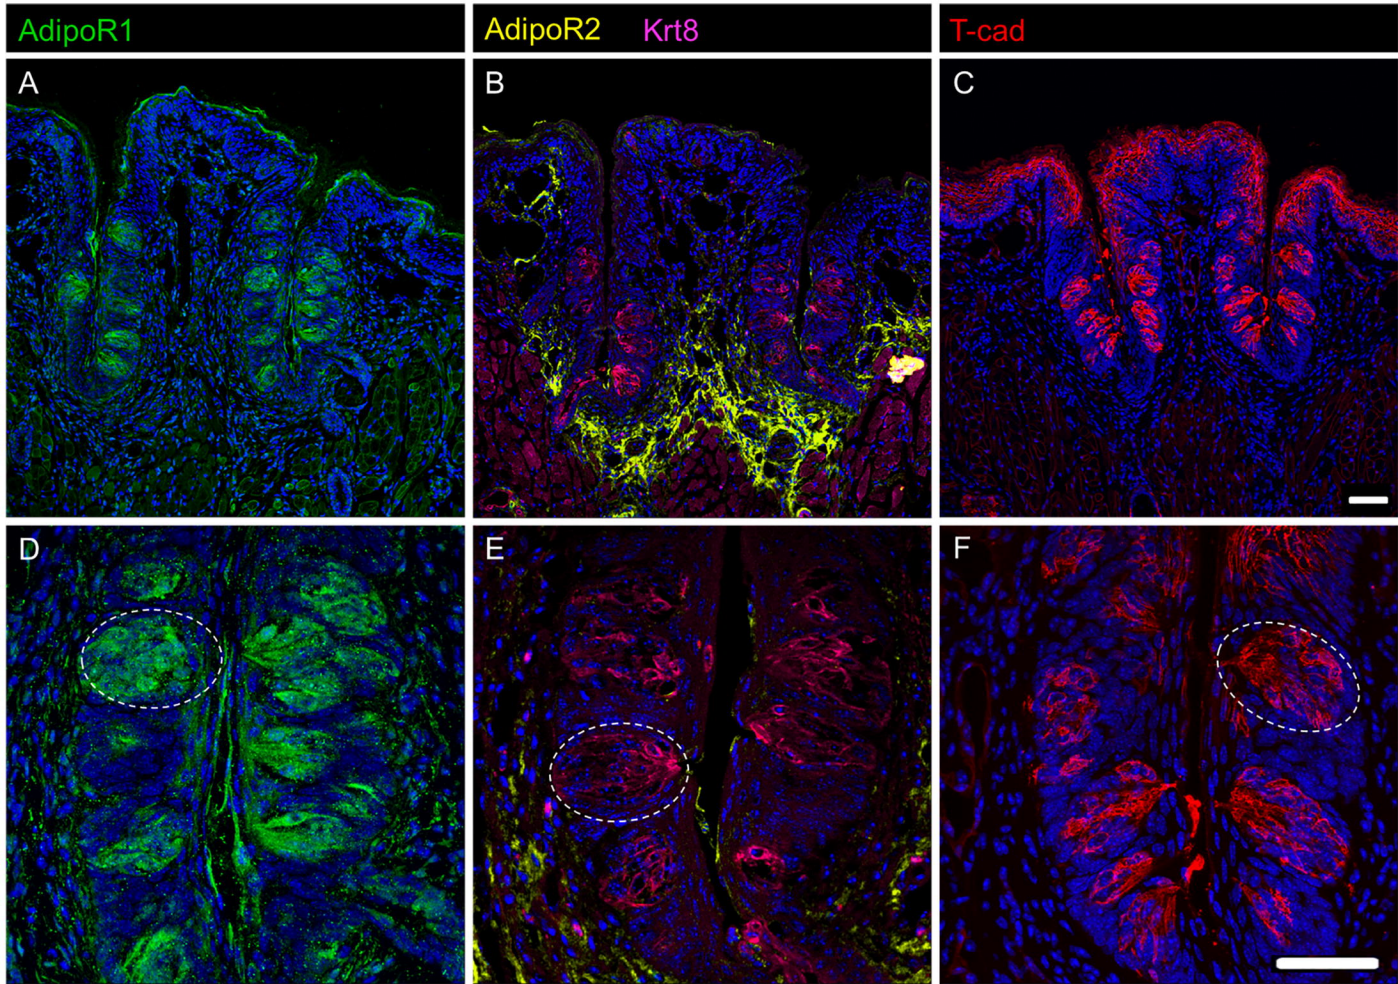

T-cad

PLC $\beta$ 2

T-cad PLC $\beta$ 2 DAPI

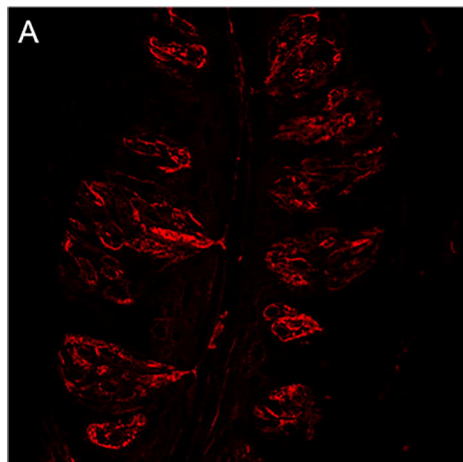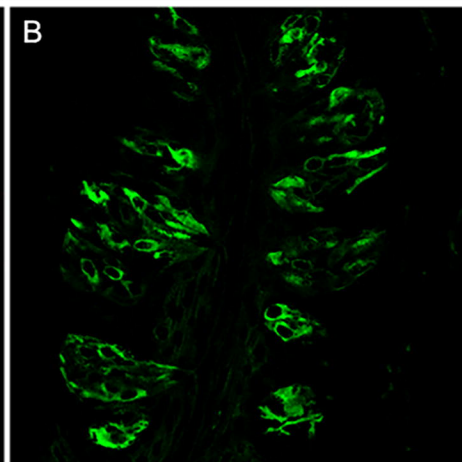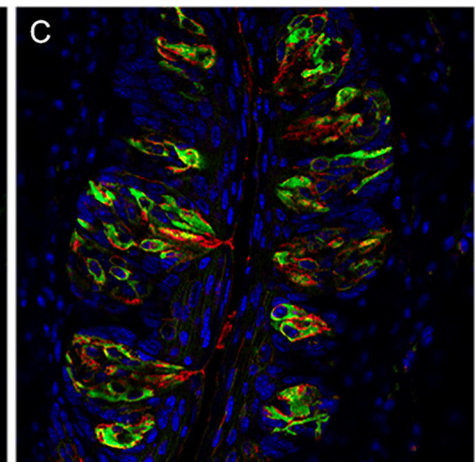

T-cad

Gustducin

T-cad Gustducin DAPI

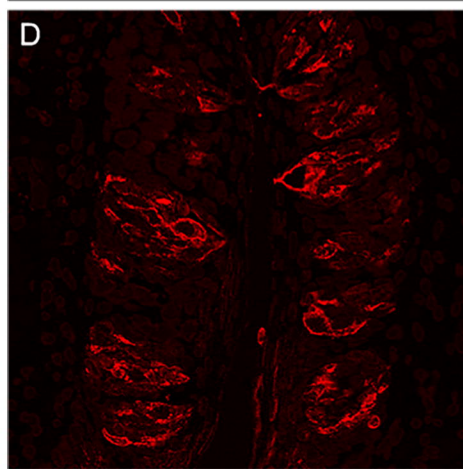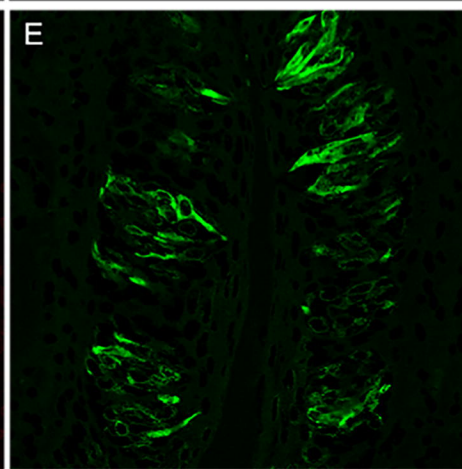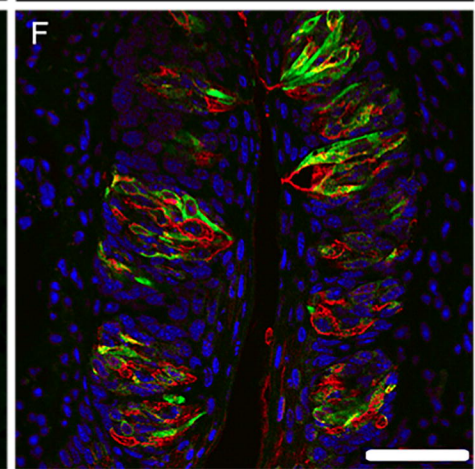

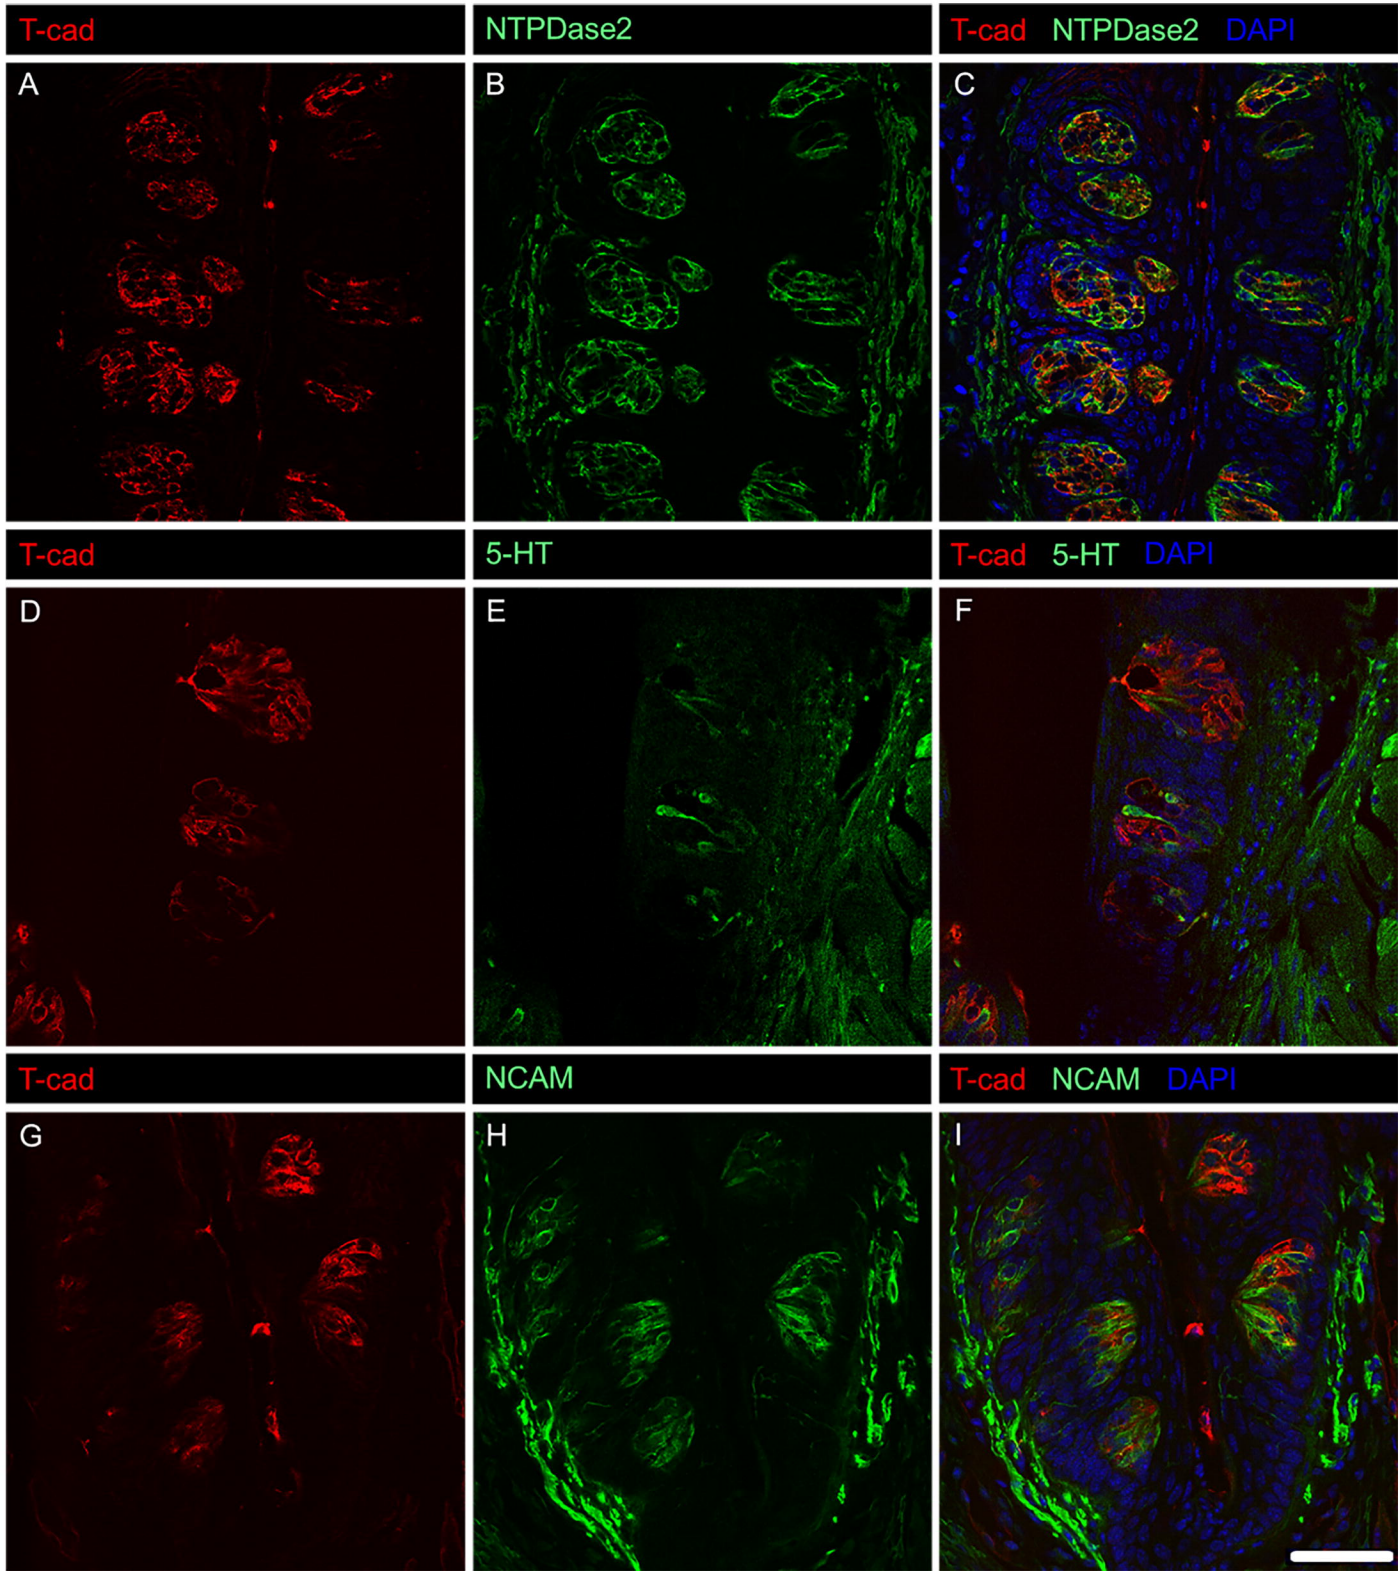

Citric Acid

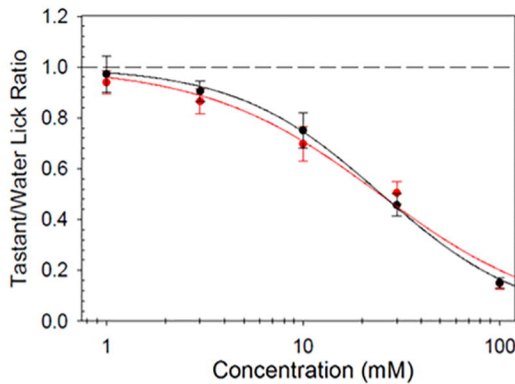

NaCl

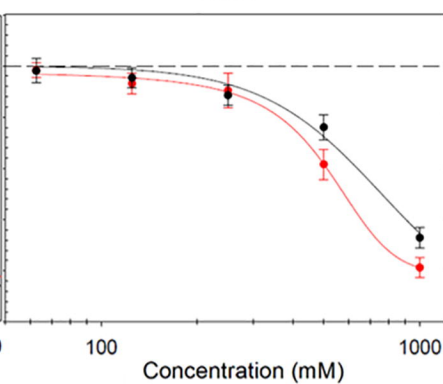

Quinine HCl

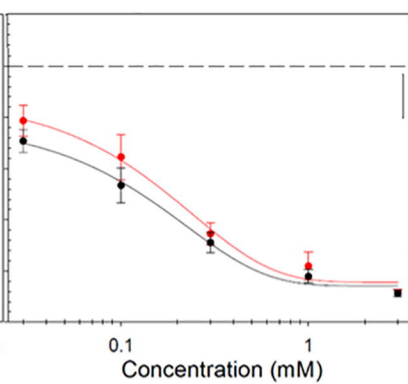

Sucrose

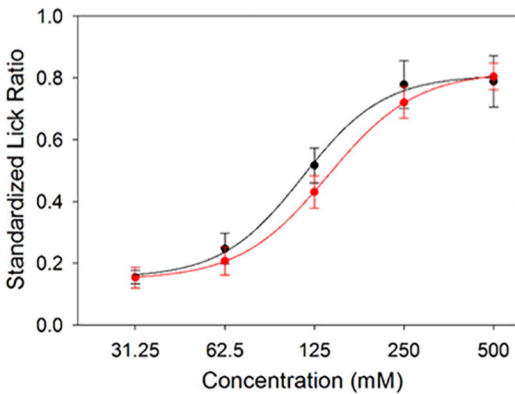

Intralipid

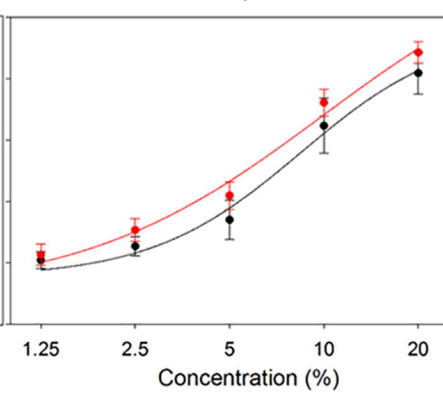

- Controls (B6129F2/J)
- APN KO (B6;129-Adipoq<sup>tm1Chan</sup>/J)



AAV2-GFP

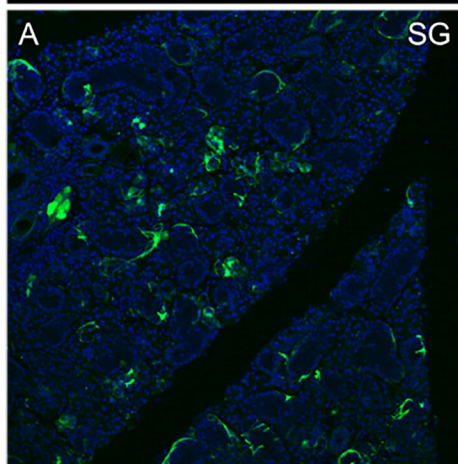

AAV8-GFP

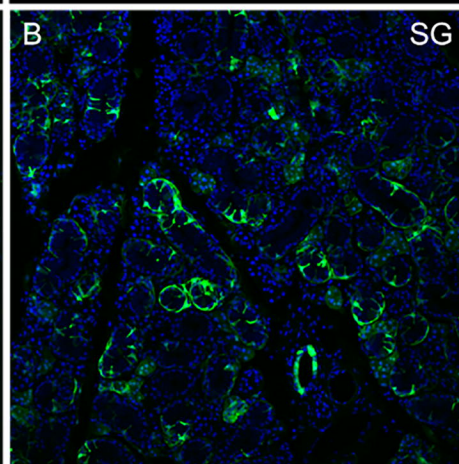

AAV5-GFP

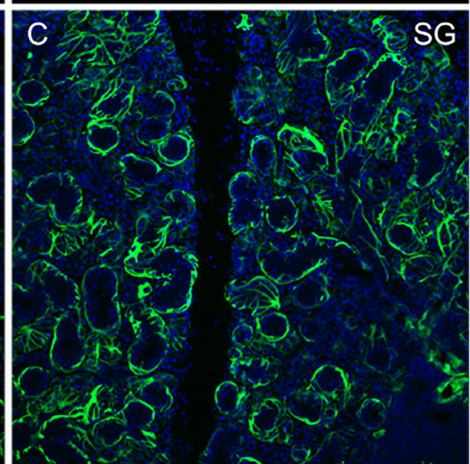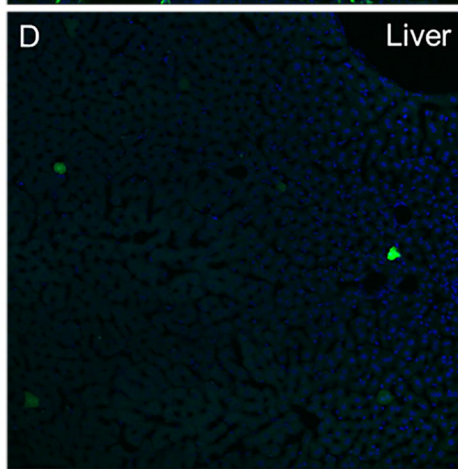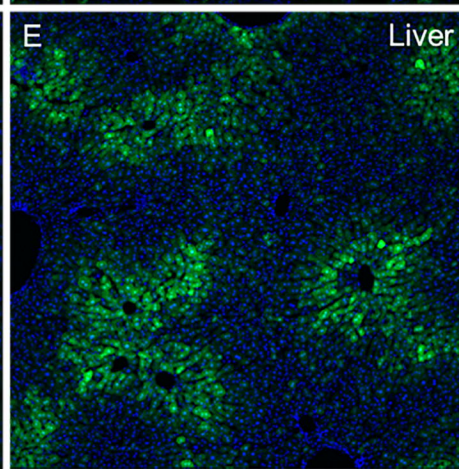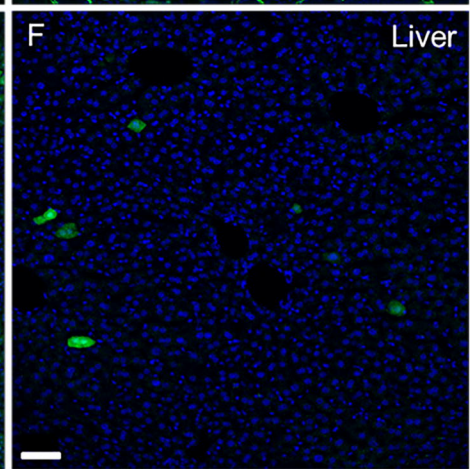

AAV5-GFP-miR

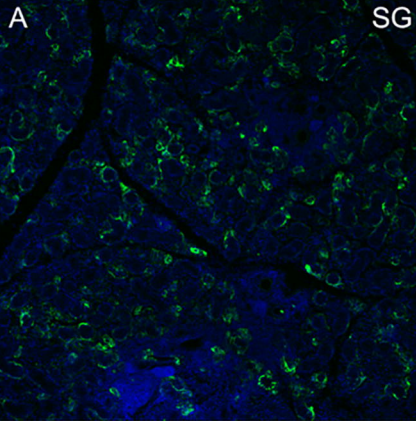

AAV5-GFP-miR

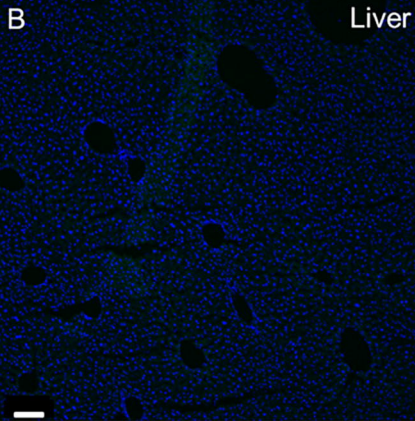

**A**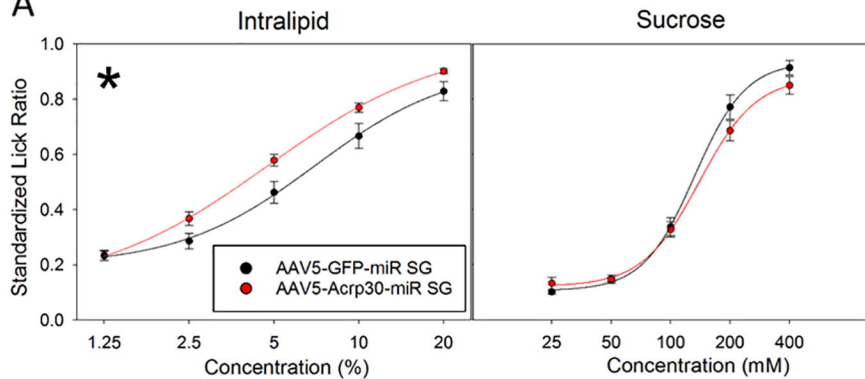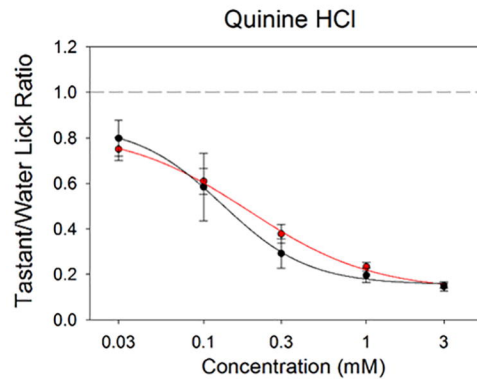**B**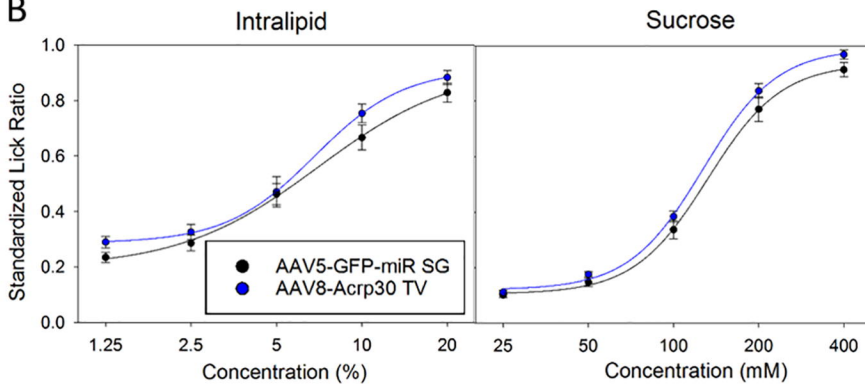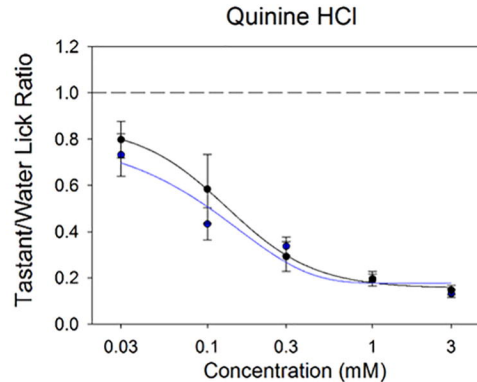

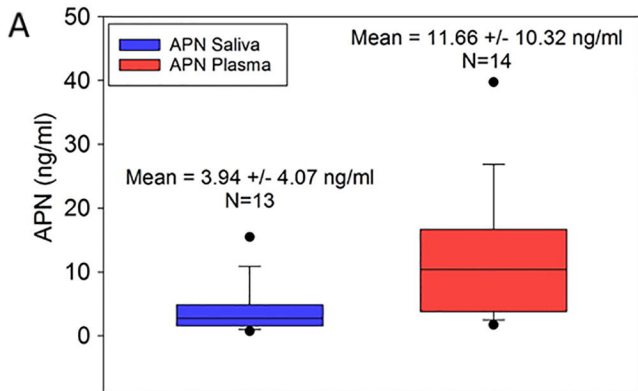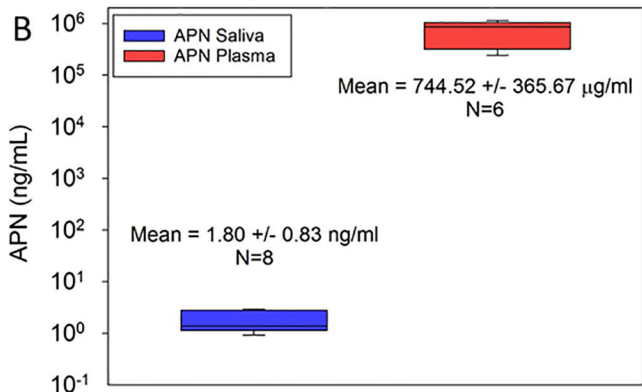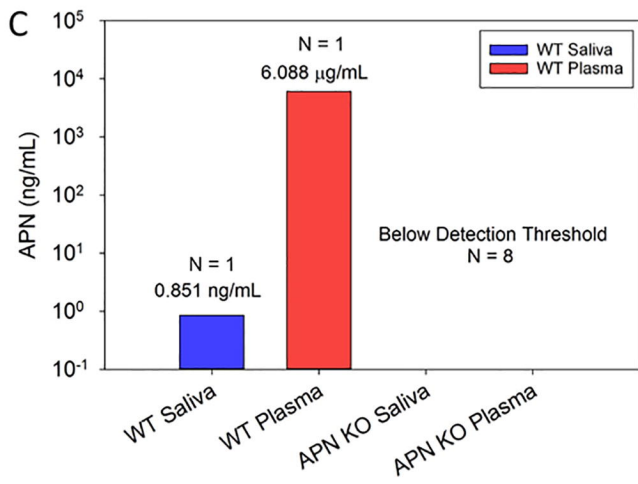

Source: https://www.biorxiv.org/content/10.1101/335927v1.full.pdf
